# Supplementary material
Source: Springer Nature journal article supplement (https://www.springermedizin.de/resource/supplementary/12888_2010_820_MOESM1_ESM.pdf/9478868)

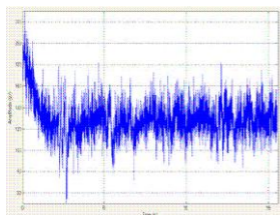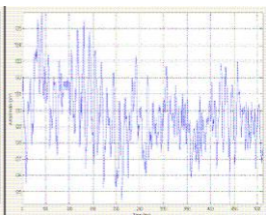

(a)

(b)

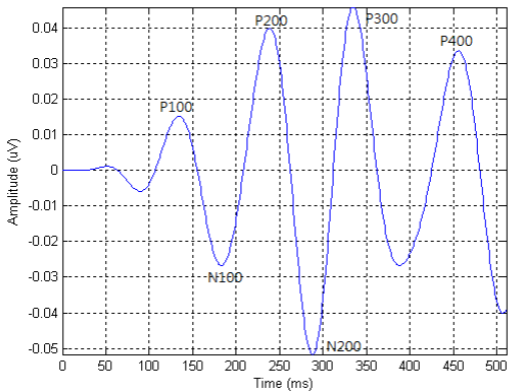

(c)

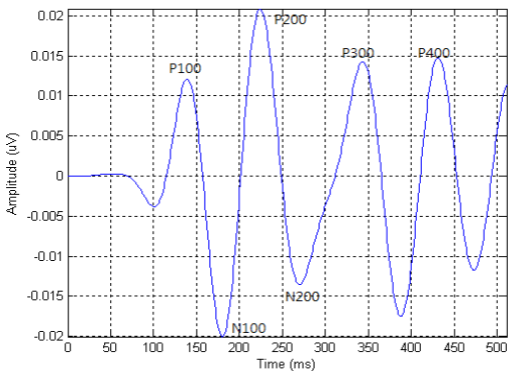

(d)

Supplement: MOESM1 [file 9478868]
